# Supplementary material
Source: HighWire-hosted journal article supplement (https://bmjopen.bmj.com/content/9/2/e026595)
Supplement: inline-supplementary-material-1 [file inline-supplementary-material-1.pdf]

## Supplementary files

### Annex 1: Full searching strategy by databases

#### *Medline searching strategy\**

|   |                                                                                                                                                                                                                                                                                                  |
|---|--------------------------------------------------------------------------------------------------------------------------------------------------------------------------------------------------------------------------------------------------------------------------------------------------|
| 1 | (predictors or factors or “quality of life” or “life quality”).tw.                                                                                                                                                                                                                               |
| 2 | (“physician therap*” or “percutaneous coronary intervention” or “PCI” or angiography or revascularization or “bleeding events” or mortality or death or “clinical intuition” or “perceived benefit” or “perceived risk” or “risk stratification” or “estimated benefit” or “estimated risk”).tw. |
| 3 | (“acute coronary syndrome” or “ACS” or “coronary heart disease” or “myocardial infarction” or “MI” or heart infarction).tw.                                                                                                                                                                      |
| 4 | 1 and 2 and 3                                                                                                                                                                                                                                                                                    |

\*MeSH terms to be added during searching

#### *PubMed searching strategy\**

|   |                                                                                                                                                                                                                                                                                            |
|---|--------------------------------------------------------------------------------------------------------------------------------------------------------------------------------------------------------------------------------------------------------------------------------------------|
| 1 | (predictors OR factors OR “quality of life” OR “life quality”)                                                                                                                                                                                                                             |
| 2 | (“physician therap*” OR “percutaneous coronary intervention” OR pci OR angiography OR revascularization OR “bleeding events” OR mortality OR death OR “clinical intuition” OR “perceived benefit” OR “perceived risk” OR “risk stratification” OR “estimated benefit” OR “estimated risk”) |
| 3 | (“acute coronary syndrome” OR acs OR “coronary heart disease” OR “myocardial infarction” OR mi OR heart infarction) NOT Medline[sb]) LIMITED to English                                                                                                                                    |
| 4 | 1 AND 2 AND 3                                                                                                                                                                                                                                                                              |

\* MeSH terms to be added during searching

#### *Web of Science searching strategy*

|   |                                                                                                                                                                                                                                                                                                  |
|---|--------------------------------------------------------------------------------------------------------------------------------------------------------------------------------------------------------------------------------------------------------------------------------------------------|
| 1 | TS= (predictors or factors QOL or HRQOL or HRQL or “quality of life” or “life quality”)                                                                                                                                                                                                          |
| 2 | TS= (“physician therap*” or “percutaneous coronary intervention” or “PCI” or angiography or revascularization or “bleeding events” or mortality or death or “clinical intuition” or “perceived benefit” or “perceived risk” or “risk stratification” or “estimated benefit” or “estimated risk”) |
| 3 | TS= (“acute coronary syndrome” or “ACS” or “coronary heart disease” or “myocardial infarction” or “MI” or heart infarction)                                                                                                                                                                      |
| 4 | 1 AND 2 AND 3; Limited by language (English)                                                                                                                                                                                                                                                     |

#### *Scopus searching strategy*

|   |                                                                                                                                                                                                                                                                                                  |
|---|--------------------------------------------------------------------------------------------------------------------------------------------------------------------------------------------------------------------------------------------------------------------------------------------------|
| 1 | ALL (predictors OR factors OR “quality of life” OR “life quality”)                                                                                                                                                                                                                               |
| 2 | ALL (“physician therap*” OR “percutaneous coronary intervention” OR “PCI” OR angiography OR revascularization OR “bleeding events” OR mortality OR death OR “clinical intuition” OR “perceived benefit” OR “perceived risk” OR “risk stratification” OR “estimated benefit” OR “estimated risk”) |
| 3 | ALL (“acute coronary syndrome” OR “ACS” OR “coronary heart disease” OR “myocardial infarction” OR “MI” OR heart infarction) ” LIMITED to English                                                                                                                                                 |
| 4 | 1 AND 2 AND 3; Limited Subject area medicine/sociology/psychology AND English                                                                                                                                                                                                                    |

***CINAHL Searching strategy\* [24.06.2018, 8:07am]***

|    |                                                                                                                                                                                                                                                                                               |
|----|-----------------------------------------------------------------------------------------------------------------------------------------------------------------------------------------------------------------------------------------------------------------------------------------------|
| S1 | Tx predictors or factors or “quality of life” or “life quality”                                                                                                                                                                                                                               |
| S2 | Tx “physician therap*” or “percutaneous coronary intervention” or “PCI” or angiography or revascularization or “bleeding events” or mortality or death or “clinical intuition” or “perceived benefit” or “perceived risk” or “risk stratification” or “estimated benefit” or “estimated risk” |
| S3 | Tx “acute coronary syndrome” or “ACS” or “coronary heart disease” or “myocardial infarction” or “MI” or heart infarction                                                                                                                                                                      |
| S4 | S1 AND S2 AND S3 AND; Limited to English                                                                                                                                                                                                                                                      |

\*MH words to be added during searching

**Annex 2: JBI quality appraisal and selection tool**

## JBI Critical Appraisal Checklist for Descriptive / Case Series

Reviewer ..... Date .....

Author ..... Year ..... Record Number .....

|                                                                                     | Yes                      | No                       | Unclear                  | Not<br>Applicable        |
|-------------------------------------------------------------------------------------|--------------------------|--------------------------|--------------------------|--------------------------|
| 1. Was study based on a random or pseudo-random sample?                             | <input type="checkbox"/> | <input type="checkbox"/> | <input type="checkbox"/> | <input type="checkbox"/> |
| 2. Were the criteria for inclusion in the sample clearly defined?                   | <input type="checkbox"/> | <input type="checkbox"/> | <input type="checkbox"/> | <input type="checkbox"/> |
| 3. Were confounding factors identified and strategies to deal with them stated?     | <input type="checkbox"/> | <input type="checkbox"/> | <input type="checkbox"/> | <input type="checkbox"/> |
| 4. Were outcomes assessed using objective criteria?                                 | <input type="checkbox"/> | <input type="checkbox"/> | <input type="checkbox"/> | <input type="checkbox"/> |
| 5. If comparisons are being made, was there sufficient descriptions of the groups?  | <input type="checkbox"/> | <input type="checkbox"/> | <input type="checkbox"/> | <input type="checkbox"/> |
| 6. Was follow up carried out over a sufficient time period?                         | <input type="checkbox"/> | <input type="checkbox"/> | <input type="checkbox"/> | <input type="checkbox"/> |
| 7. Were the outcomes of people who withdrew described and included in the analysis? | <input type="checkbox"/> | <input type="checkbox"/> | <input type="checkbox"/> | <input type="checkbox"/> |
| 8. Were outcomes measured in a reliable way?                                        | <input type="checkbox"/> | <input type="checkbox"/> | <input type="checkbox"/> | <input type="checkbox"/> |
| 9. Was appropriate statistical analysis used?                                       | <input type="checkbox"/> | <input type="checkbox"/> | <input type="checkbox"/> | <input type="checkbox"/> |

Overall appraisal:      Include ☐      Exclude ☐      Seek further info ☐

Comments (Including reason for exclusion)

---

---

---

## JBI Critical Appraisal Checklist for Comparable Cohort/ Case Control

Reviewer \_\_\_\_\_ Date \_\_\_\_\_

Author \_\_\_\_\_ Year \_\_\_\_\_ Record Number \_\_\_\_\_

|                                                                                     | Yes                      | No                       | Unclear                  | Not Applicable           |
|-------------------------------------------------------------------------------------|--------------------------|--------------------------|--------------------------|--------------------------|
| 1. Is sample representative of patients in the population as a whole?               | <input type="checkbox"/> | <input type="checkbox"/> | <input type="checkbox"/> | <input type="checkbox"/> |
| 2. Are the patients at a similar point in the course of their condition/illness?    | <input type="checkbox"/> | <input type="checkbox"/> | <input type="checkbox"/> | <input type="checkbox"/> |
| 3. Has bias been minimised in relation to selection of cases and of controls?       | <input type="checkbox"/> | <input type="checkbox"/> | <input type="checkbox"/> | <input type="checkbox"/> |
| 4. Are confounding factors identified and strategies to deal with them stated?      | <input type="checkbox"/> | <input type="checkbox"/> | <input type="checkbox"/> | <input type="checkbox"/> |
| 5. Are outcomes assessed using objective criteria?                                  | <input type="checkbox"/> | <input type="checkbox"/> | <input type="checkbox"/> | <input type="checkbox"/> |
| 6. Was follow up carried out over a sufficient time period?                         | <input type="checkbox"/> | <input type="checkbox"/> | <input type="checkbox"/> | <input type="checkbox"/> |
| 7. Were the outcomes of people who withdrew described and included in the analysis? | <input type="checkbox"/> | <input type="checkbox"/> | <input type="checkbox"/> | <input type="checkbox"/> |
| 8. Were outcomes measured in a reliable way?                                        | <input type="checkbox"/> | <input type="checkbox"/> | <input type="checkbox"/> | <input type="checkbox"/> |
| 9. Was appropriate statistical analysis used?                                       | <input type="checkbox"/> | <input type="checkbox"/> | <input type="checkbox"/> | <input type="checkbox"/> |

Overall appraisal:      Include ☐      Exclude ☐      Seek further info. ☐

Comments (Including reason for exclusion)

---



---



---

## **JBI Critical Appraisal Checklist for Randomised Control / Pseudo-randomised Trial**

Reviewer \_\_\_\_\_ Date \_\_\_\_\_

Author \_\_\_\_\_ Year \_\_\_\_\_ Record Number \_\_\_\_\_

|                                                                                     | Yes                      | No                       | Unclear                  | Not Applicable           |
|-------------------------------------------------------------------------------------|--------------------------|--------------------------|--------------------------|--------------------------|
| 1. Was the assignment to treatment groups truly random?                             | <input type="checkbox"/> | <input type="checkbox"/> | <input type="checkbox"/> | <input type="checkbox"/> |
| 2. Were participants blinded to treatment allocation?                               | <input type="checkbox"/> | <input type="checkbox"/> | <input type="checkbox"/> | <input type="checkbox"/> |
| 3. Was allocation to treatment groups concealed from the allocator?                 | <input type="checkbox"/> | <input type="checkbox"/> | <input type="checkbox"/> | <input type="checkbox"/> |
| 4. Were the outcomes of people who withdrew described and included in the analysis? | <input type="checkbox"/> | <input type="checkbox"/> | <input type="checkbox"/> | <input type="checkbox"/> |
| 5. Were those assessing outcomes blind to the treatment allocation?                 | <input type="checkbox"/> | <input type="checkbox"/> | <input type="checkbox"/> | <input type="checkbox"/> |
| 6. Were the control and treatment groups comparable at entry?                       | <input type="checkbox"/> | <input type="checkbox"/> | <input type="checkbox"/> | <input type="checkbox"/> |
| 7. Were groups treated identically other than for the named interventions           | <input type="checkbox"/> | <input type="checkbox"/> | <input type="checkbox"/> | <input type="checkbox"/> |
| 8. Were outcomes measured in the same way for all groups?                           | <input type="checkbox"/> | <input type="checkbox"/> | <input type="checkbox"/> | <input type="checkbox"/> |
| 9. Were outcomes measured in a reliable way?                                        | <input type="checkbox"/> | <input type="checkbox"/> | <input type="checkbox"/> | <input type="checkbox"/> |
| 10. Was appropriate statistical analysis used?                                      | <input type="checkbox"/> | <input type="checkbox"/> | <input type="checkbox"/> | <input type="checkbox"/> |
|                                                                                     | <input type="checkbox"/> | <input type="checkbox"/> | <input type="checkbox"/> | <input type="checkbox"/> |

Overall appraisal:      Include ☐                  Exclude ☐                  Seek further info. ☐

Comments (Including reason for exclusion)

---



---



---

## JBI Critical Appraisal Checklist for Systematic Reviews and Research Syntheses

Reviewer \_\_\_\_\_ Date \_\_\_\_\_

Author \_\_\_\_\_ Year \_\_\_\_\_ Record Number \_\_\_\_\_

|                                                                                     | Yes                      | No                       | Unclear                  | Not applicable           |
|-------------------------------------------------------------------------------------|--------------------------|--------------------------|--------------------------|--------------------------|
| 1. Is the review question clearly and explicitly stated?                            | <input type="checkbox"/> | <input type="checkbox"/> | <input type="checkbox"/> | <input type="checkbox"/> |
| 2. Were the inclusion criteria appropriate for the review question?                 | <input type="checkbox"/> | <input type="checkbox"/> | <input type="checkbox"/> | <input type="checkbox"/> |
| 3. Was the search strategy appropriate?                                             | <input type="checkbox"/> | <input type="checkbox"/> | <input type="checkbox"/> | <input type="checkbox"/> |
| 4. Were the sources and resources used to search for studies adequate?              | <input type="checkbox"/> | <input type="checkbox"/> | <input type="checkbox"/> | <input type="checkbox"/> |
| 5. Were the criteria for appraising studies appropriate?                            | <input type="checkbox"/> | <input type="checkbox"/> | <input type="checkbox"/> | <input type="checkbox"/> |
| 6. Was critical appraisal conducted by two or more reviewers independently?         | <input type="checkbox"/> | <input type="checkbox"/> | <input type="checkbox"/> | <input type="checkbox"/> |
| 7. Were there methods to minimize errors in data extraction?                        | <input type="checkbox"/> | <input type="checkbox"/> | <input type="checkbox"/> | <input type="checkbox"/> |
| 8. Were the methods used to combine studies appropriate?                            | <input type="checkbox"/> | <input type="checkbox"/> | <input type="checkbox"/> | <input type="checkbox"/> |
| 9. Was the likelihood of publication bias assessed?                                 | <input type="checkbox"/> | <input type="checkbox"/> | <input type="checkbox"/> | <input type="checkbox"/> |
| 10. Were recommendations for policy and/or practice supported by the reported data? | <input type="checkbox"/> | <input type="checkbox"/> | <input type="checkbox"/> | <input type="checkbox"/> |
| 11. Were the specific directives for new research appropriate?                      | <input type="checkbox"/> | <input type="checkbox"/> | <input type="checkbox"/> | <input type="checkbox"/> |

Overall appraisal:      Include ☐      Exclude ☐      Seek further info ☐

---



---

## Annex 3: JBI-data extraction instruments

### JBI Data Extraction Form for Experimental / Observational Studies

Reviewer ..... Date .....

Author ..... Year .....

Journal ..... Record Number .....

#### Study Method

RCT ☐ Quasi-RCT ☐ Longitudinal ☐

Retrospective ☐ Observational ☐ Other ☐

#### Participants

Setting .....

Population .....

#### Sample size

Group A ..... Group B .....

#### Interventions

Intervention A .....

Intervention B .....

Authors Conclusions: .....

Reviewers Conclusions: .....
